# Supplementary material for: Impact of Land Use Change on the Water Environment of a Key Marsh Area in Vientiane Capital, Laos
Source: MDPI journal article supplement (doi:10.3390/w15244302), 2023-12-18
Supplement: s1 [file s1]

## Supplementary material

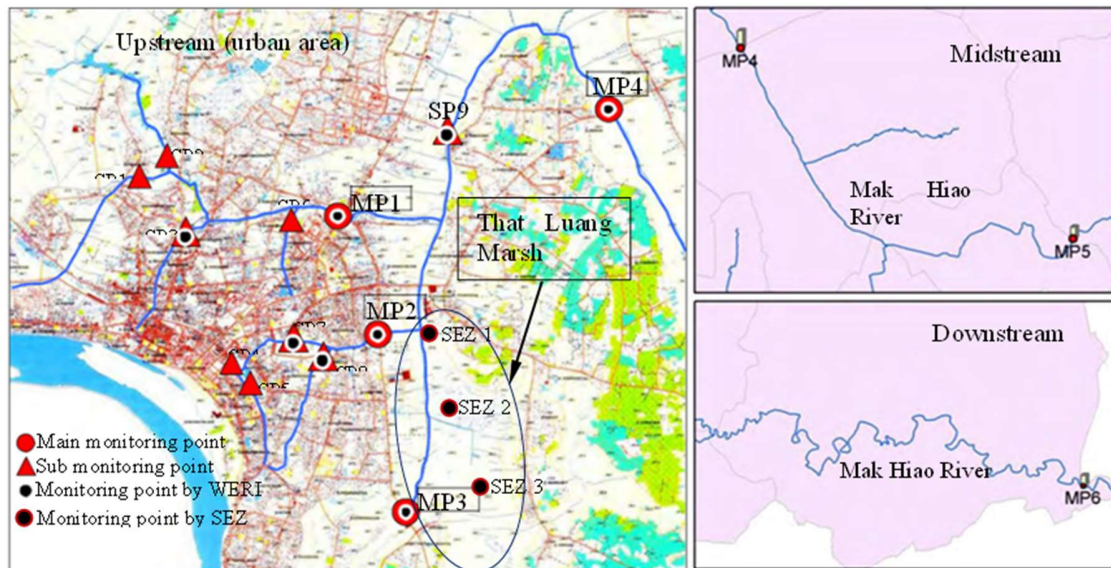

Figure S1. Location of discrete monitoring points by different projects in the center of Vientiane Capital.

Table S1. Satellite image and sources.

| Satellite | Sensor   | Resolution (m) | Acquisition date | Source                                                                                                     |
|-----------|----------|----------------|------------------|------------------------------------------------------------------------------------------------------------|
| Landsat5  | TM       | 30×30          | 27 March 2001    | Collection 2 Level 2<br>from <a href="https://earthexplorer.usgs.gov/">https://earthexplorer.usgs.gov/</a> |
| Landsat5  | TM       | 30×30          | 06 March 2005    |                                                                                                            |
| Landsat5  | TM       | 30×30          | 20 March 2010    |                                                                                                            |
| Landsat8  | OLI-TIRS | 30×30          | 18 March 2015    |                                                                                                            |
| Landsat8  | OLI-TIRS | 30×30          | 31 March 2020    |                                                                                                            |

Table S2. Confusion matrix results for LULC classification.

| LULC class    | Producer accuracy (%) |       |       |       |       | User accuracy (%) |       |       |       |       |
|---------------|-----------------------|-------|-------|-------|-------|-------------------|-------|-------|-------|-------|
|               | 2001                  | 2005  | 2010  | 2015  | 2020  | 2001              | 2005  | 2010  | 2015  | 2020  |
| Agriculture   | 75.76                 | 90.00 | 82.14 | 90.00 | 81.82 | 83.33             | 90.00 | 76.67 | 90.00 | 90.00 |
| Bare land     | 86.21                 | 96.67 | 96.43 | 87.50 | 88.89 | 83.33             | 96.67 | 90.00 | 93.33 | 80.00 |
| Built-up area | 90.00                 | 96.67 | 90.91 | 93.10 | 81.82 | 90.00             | 96.67 | 98.00 | 90.00 | 90.00 |
| Vegetation    | 83.33                 | 88.24 | 92.86 | 85.29 | 100.0 | 83.33             | 100.0 | 86.67 | 96.67 | 100.0 |
| Waterbody     | 100.0                 | 100.0 | 100.0 | 100.0 | 90.91 | 93.33             | 96.67 | 100.0 | 100.0 | 100.0 |
| Wetland       | 86.67                 | 92.59 | 78.79 | 100.0 | 87.50 | 86.67             | 83.33 | 86.67 | 83.33 | 70.00 |

Table S3. Flow rate at different monitoring points in Vientiane Capital.

| No. | Monitoring point | Flow rate (m <sup>3</sup> /s) in 2009 |        |        |
|-----|------------------|---------------------------------------|--------|--------|
|     |                  | Min                                   | Mean   | Max    |
| 1   | SP1              | 0.070                                 | 0.218  | 0.750  |
| 2   | SP2              | 0.050                                 | 1.492  | 7.200  |
| 3   | SP3              | 0.047                                 | 0.091  | 0.180  |
| 4   | SP4              | 0.081                                 | 0.308  | 0.560  |
| 5   | SP5              | 0.064                                 | 0.074  | 0.085  |
| 6   | SP6              | 0.055                                 | 0.134  | 0.400  |
| 7   | SP7              | 0.200                                 | 0.426  | 0.700  |
| 8   | SP8              | 0.034                                 | 0.048  | 0.078  |
| 9   | SP9              | 0.092                                 | 2.998  | 10.000 |
| 10  | MP1              | 0.470                                 | 2.290  | 8.800  |
| 11  | MP2              | 0.440                                 | 1.438  | 4.700  |
| 12  | MP3              | 0.050                                 | 0.494  | 0.910  |
| 13  | MP4              | 0.150                                 | 4.418  | 16.000 |
| 14  | MP5              | 0.650                                 | 10.152 | 46.000 |
| 15  | MP6              | 0.300                                 | 12.974 | 56.000 |

Table S4. Nutrient concentration monitored by JICA.

| No. | Monitoring point | NO <sub>3</sub> <sup>-</sup> -N (mg/L) in 2009 |       |       |
|-----|------------------|------------------------------------------------|-------|-------|
|     |                  | Min                                            | Mean  | Max   |
| 1   | SP1              | 0.050                                          | 0.238 | 0.570 |
| 2   | SP2              | 0.000                                          | 0.280 | 0.900 |
| 3   | SP3              | 0.100                                          | 0.410 | 0.900 |
| 4   | SP4              | 0.100                                          | 0.558 | 1.520 |
| 5   | SP5              | 0.100                                          | 0.478 | 1.120 |
| 6   | SP6              | 0.100                                          | 0.388 | 0.670 |
| 7   | SP7              | 0.000                                          | 0.278 | 0.570 |
| 8   | SP8              | 0.050                                          | 0.650 | 2.500 |
| 9   | SP9              | 0.200                                          | 1.004 | 2.930 |
| 10  | MP1              | 0.100                                          | 0.504 | 1.350 |
| 11  | MP2              | 0.000                                          | 0.954 | 2.250 |
| 12  | MP3              | 0.100                                          | 1.030 | 2.250 |
| 13  | MP4              | 0.500                                          | 0.982 | 2.020 |
| 14  | MP5              | 0.200                                          | 1.074 | 2.250 |
| 15  | MP6              | 0.220                                          | 1.068 | 2.250 |

Note: The data source was obtained from: JICA. *The Study on Improvement of Water Environment in Vientiane City Final Report*; JICA: Tokyo, Japan, 2011.

Table S5. Nutrient load from Vientiane Capital at different monitoring points.

| No. | Monitoring point | NO <sub>3</sub> <sup>-</sup> -N (kg/year) 2009 |           |            |
|-----|------------------|------------------------------------------------|-----------|------------|
|     |                  | Min                                            | Mean      | Max        |
| 1   | SP1              | 137.18                                         | 3016.17   | 13,481.64  |
| 2   | SP2              | -                                              | 20,763.30 | 102,176.64 |
| 3   | SP3              | 296.44                                         | 1034.63   | 1873.24    |
| 4   | SP4              | 536.11                                         | 6684.50   | 19,173.89  |
| 5   | SP5              | 242.83                                         | 1069.01   | 2366.46    |
| 6   | SP6              | 296.44                                         | 1720.04   | 5676.48    |
| 7   | SP7              | -                                              | 4017.69   | 12,582.86  |
| 8   | SP8              | 53.61                                          | 813.00    | 2759.40    |
| 9   | SP9              | 580.26                                         | 84,197.34 | 211,291.20 |
| 10  | MP1              | 2207.52                                        | 27,653.92 | 97,130.88  |
| 11  | MP2              | -                                              | 30,476.39 | 66,698.64  |
| 12  | MP3              | 157.68                                         | 15,477.87 | 28,697.76  |
| 13  | MP4              | 9555.41                                        | 91,557.84 | 338,065.92 |
| 14  | MP5              | 5865.70                                        | 197,992.4 | 826,873.92 |
| 15  | MP6              | 2081.38                                        | 278,831.8 | 1,006,629  |

Table S6. Calibration parameters for the NDR model.

| Parameter                            | Retention value | Default value            | Optimum value |
|--------------------------------------|-----------------|--------------------------|---------------|
| k                                    | -               | 2                        | 2             |
| TFA                                  | -               | 1000                     | 100           |
| NO <sub>3</sub> <sup>-</sup> -N load | -               | By LULC                  | By LULC       |
| Critical length                      | -               | 12.5×12.5 m <sup>2</sup> | 12.5          |
| Retention efficiency:                |                 |                          |               |
| Agriculture                          | 0.56            | -                        | -             |
| Bareland                             | 0.05            | -                        | -             |
| Built-up                             | 0.15            | -                        | -             |
| Vegetation                           | 0.80            | -                        | -             |
| Waterbody                            | 0.25            | -                        | -             |
| Wetland                              | 0.85            | -                        | -             |

Note: TFA = Threshold Flow Accumulation.
